# Supplementary material for: Social Media Usage among Dental Undergraduate Students—A Comparative Study
Source: MDPI journal article supplement (doi:10.3390/healthcare9111408), 2021-10-20
Supplement: s1 [file s1]

## Questionnaire on Social Media usage by Dental Students

1. What dental school are you at?
  - ☐ University of Helsinki
  - ☐ University of Oulu
  - ☐ Manipal University College Malaysia
  - ☐ Faculty of Dentistry, University Malaya
  
2. What is your sex?
  - ☐ Male
  - ☐ Female
  
3. What is your age?
  - ☐ 20 or younger
  - ☐ 21-23
  - ☐ 24-26
  - ☐ 27-29
  - ☐ 30-35
  - ☐ 35 and above
  
4. How do you identify yourself? (In the Finnish version, this was replaced by the following text (in Finnish): The question is related to ethnic background and does not concern Finnish students)
  - ☐ Malay
  - ☐ Chinese
  - ☐ Indian
  - ☐ Other Bumiputera
  - ☐ Other (please specify)  
.....
  
5. What year of dental school are you currently in?
  - ☐ First
  - ☐ Second
  - ☐ Third
  - ☐ Fourth
  - ☐ Fifth
  - ☐ Other (please specify) .....

6. How familiar are you with each of the following social media services?

|                                 | Never heard of it | Heard of it; not sure of its purpose | Familiar with its purpose | Very familiar with its purpose |
|---------------------------------|-------------------|--------------------------------------|---------------------------|--------------------------------|
| <input type="radio"/> Facebook  |                   |                                      |                           |                                |
| <input type="radio"/> Twitter   |                   |                                      |                           |                                |
| <input type="radio"/> LinkedIn  |                   |                                      |                           |                                |
| <input type="radio"/> YouTube   |                   |                                      |                           |                                |
| <input type="radio"/> Google+   |                   |                                      |                           |                                |
| <input type="radio"/> Pinterest |                   |                                      |                           |                                |
| <input type="radio"/> Tumblr    |                   |                                      |                           |                                |
| <input type="radio"/> Instagram |                   |                                      |                           |                                |
| <input type="radio"/> WhatsApp  |                   |                                      |                           |                                |
| <input type="radio"/> Snapchat  |                   |                                      |                           |                                |
| <input type="radio"/> Jodel     |                   |                                      |                           |                                |
| <input type="radio"/> TikTok    |                   |                                      |                           |                                |
| <input type="radio"/> Telegram  |                   |                                      |                           |                                |
| <input type="radio"/> WeChat    |                   |                                      |                           |                                |
| <input type="radio"/> Weibo     |                   |                                      |                           |                                |

If there are other social media services with which you are familiar, please list and rate your familiarity here.

.....

7. How competent are you at using each of the following social media services?

|                                 | Not at all | Beginner | Competent | Highly competent |
|---------------------------------|------------|----------|-----------|------------------|
| <input type="radio"/> Facebook  |            |          |           |                  |
| <input type="radio"/> Twitter   |            |          |           |                  |
| <input type="radio"/> LinkedIn  |            |          |           |                  |
| <input type="radio"/> YouTube   |            |          |           |                  |
| <input type="radio"/> Google+   |            |          |           |                  |
| <input type="radio"/> Pinterest |            |          |           |                  |
| <input type="radio"/> Tumblr    |            |          |           |                  |
| <input type="radio"/> Instagram |            |          |           |                  |
| <input type="radio"/> WhatsApp  |            |          |           |                  |
| <input type="radio"/> Snapchat  |            |          |           |                  |
| <input type="radio"/> Jodel     |            |          |           |                  |
| <input type="radio"/> TikTok    |            |          |           |                  |
| <input type="radio"/> Telegram  |            |          |           |                  |
| <input type="radio"/> WeChat    |            |          |           |                  |
| <input type="radio"/> Weibo     |            |          |           |                  |

If there are other social media services that you use, please list and rate your competence here:

.....

8. How often do you use each of the following social media services?

|             | Never | Occasionally<br>(not usually<br>more than once<br>a month) | Regularly (not<br>daily but at<br>least weekly) | Frequently<br>(daily) | Very<br>frequently<br>(several times<br>a day) |
|-------------|-------|------------------------------------------------------------|-------------------------------------------------|-----------------------|------------------------------------------------|
| ○ Facebook  |       |                                                            |                                                 |                       |                                                |
| ○ Twitter   |       |                                                            |                                                 |                       |                                                |
| ○ LinkedIn  |       |                                                            |                                                 |                       |                                                |
| ○ YouTube   |       |                                                            |                                                 |                       |                                                |
| ○ Google+   |       |                                                            |                                                 |                       |                                                |
| ○ Pinterest |       |                                                            |                                                 |                       |                                                |
| ○ Tumblr    |       |                                                            |                                                 |                       |                                                |
| ○ Instagram |       |                                                            |                                                 |                       |                                                |
| ○ WhatsApp  |       |                                                            |                                                 |                       |                                                |
| ○ Snapchat  |       |                                                            |                                                 |                       |                                                |
| ○ Jodel     |       |                                                            |                                                 |                       |                                                |
| ○ TikTok    |       |                                                            |                                                 |                       |                                                |
| ○ Telegram  |       |                                                            |                                                 |                       |                                                |
| ○ WeChat    |       |                                                            |                                                 |                       |                                                |
| ○ Weibo     |       |                                                            |                                                 |                       |                                                |

If there are other social media services that you use, please list and rate how often you use them here:

.....

9. How important is each of the following factors in encouraging you to use social media?

|                                                          | Not at all<br>important | Somewhat<br>important | Very<br>important | I don't use<br>social media |
|----------------------------------------------------------|-------------------------|-----------------------|-------------------|-----------------------------|
| To stay in touch with current friends and family members |                         |                       |                   |                             |
| To connect with old friends, I have lost touch with      |                         |                       |                   |                             |
| To connect around a shared hobby                         |                         |                       |                   |                             |
| To communicate about issues relating to dental training  |                         |                       |                   |                             |

10. How much do the following reasons prevent you from using social media?

|                                          | Not at all | Somewhat | Very much |
|------------------------------------------|------------|----------|-----------|
| Lack of knowledge                        |            |          |           |
| Lack of time                             |            |          |           |
| Lack of interest                         |            |          |           |
| Lack of perceived value                  |            |          |           |
| Concern about harm to professional image |            |          |           |

Other (please specify): .....

11. Approximately how many hours **A WEEK** do you spend using social media?

- ☐ Do not use)
- ☐ Less than 5 hours
- ☐ 6-10 hours
- ☐ 11-15 hours
- ☐ 16-20 hours
- ☐ More than 20 hours

12. Approximately how many hours **A WEEK** do you spend using the following social media services as **part of your dental education?**

|                                 | Do not<br>use | Less than<br>1 hour | 1-5 hours | 6-10<br>hours | 11-15<br>hours | 16-20<br>hours | More than<br>20 hours |
|---------------------------------|---------------|---------------------|-----------|---------------|----------------|----------------|-----------------------|
| <input type="radio"/> Facebook  |               |                     |           |               |                |                |                       |
| <input type="radio"/> Twitter   |               |                     |           |               |                |                |                       |
| <input type="radio"/> Linked In |               |                     |           |               |                |                |                       |
| <input type="radio"/> YouTube   |               |                     |           |               |                |                |                       |
| <input type="radio"/> Google+   |               |                     |           |               |                |                |                       |
| <input type="radio"/> Pinterest |               |                     |           |               |                |                |                       |
| <input type="radio"/> Tumblr    |               |                     |           |               |                |                |                       |
| <input type="radio"/> Instagram |               |                     |           |               |                |                |                       |
| <input type="radio"/> Whatsapp  |               |                     |           |               |                |                |                       |
| <input type="radio"/> Snap chat |               |                     |           |               |                |                |                       |
| <input type="radio"/> Jodel     |               |                     |           |               |                |                |                       |
| <input type="radio"/> Tik Tok   |               |                     |           |               |                |                |                       |
| <input type="radio"/> Telegram  |               |                     |           |               |                |                |                       |
| <input type="radio"/> WeChat    |               |                     |           |               |                |                |                       |
| <input type="radio"/> Weibo     |               |                     |           |               |                |                |                       |
